# Supplementary material for: Capacitance-enhanced sodium-ion storage in nitrogen-rich hard carbon
Source: Royal Society of Chemistry journal article supplement (doi:10.1039/c7ta06754b), 2017-01-01
Supplement: c7ta06754b1.pdf [file c7ta06754b1.pdf]

## Electronic Supplementary Information for

### Capacitance-enhanced sodium-ion storage in nitrogen-rich hard carbon

Rohit Ranganathan Gaddam,<sup>a</sup> Amir H. Farokh Niaei,<sup>b</sup> Marlies Hankel,<sup>b</sup> Debra J. Searles,<sup>b,c</sup>  
Nanjundan Ashok Kumar<sup>a\*</sup> and X. S. Zhao<sup>a\*</sup>

<sup>a</sup>School of Chemical Engineering,  
The University of Queensland, St Lucia, Brisbane 4072 Australia.

<sup>b</sup>Centre for Theoretical and Computational Molecular Science,  
Australian Institute for Bioengineering and Nanotechnology,  
The University of Queensland, Brisbane, QLD, 4072, Australia

<sup>c</sup> School of Chemistry and Molecular Biosciences,  
The University of Queensland, Brisbane, QLD, 4072, Australia

Correspondence to: [ashok.nanjundan@uq.edu.au](mailto:ashok.nanjundan@uq.edu.au), [geroge.zhao@uq.edu.au](mailto:geroge.zhao@uq.edu.au) ;

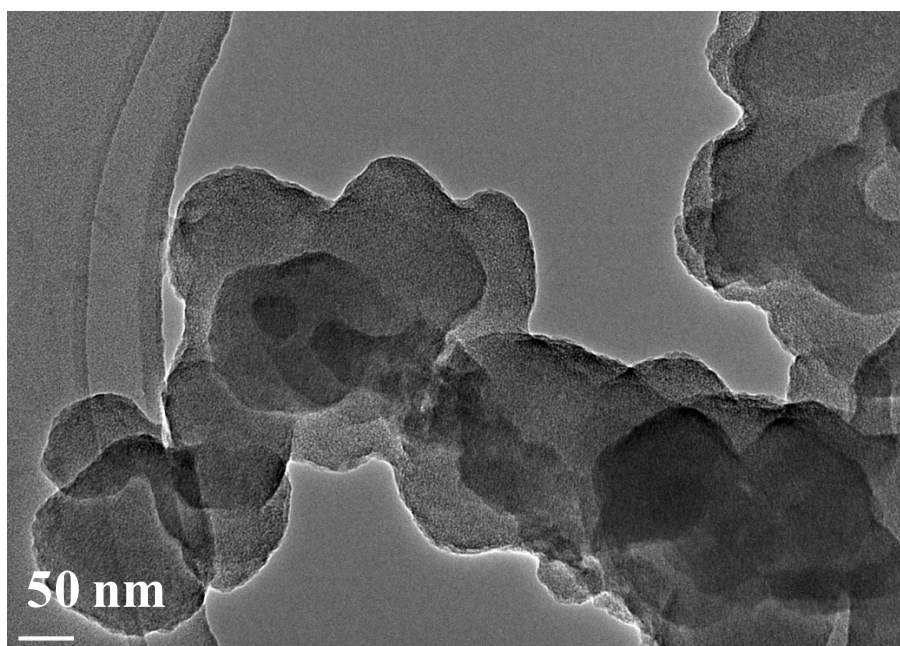

**Figure S1.** Transmission electron microscope image of HCS.

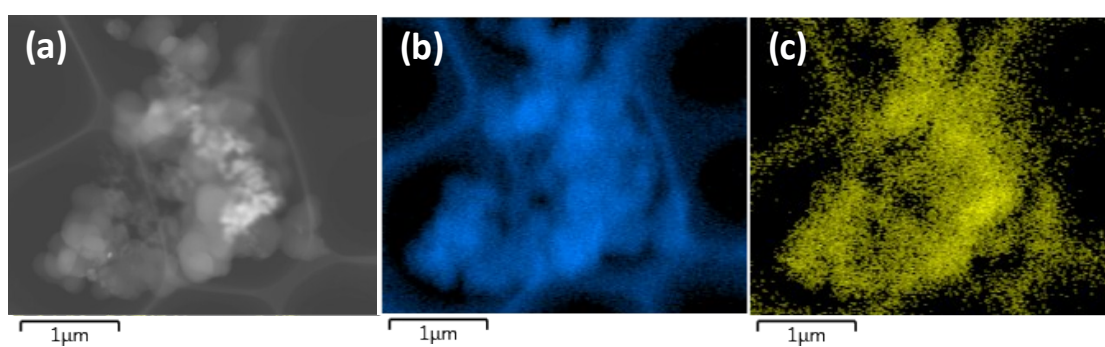

**Figure S2.** Energy dispersive X-ray mapping of HCS: (a) electron image, (b) carbon, and (c) oxygen.

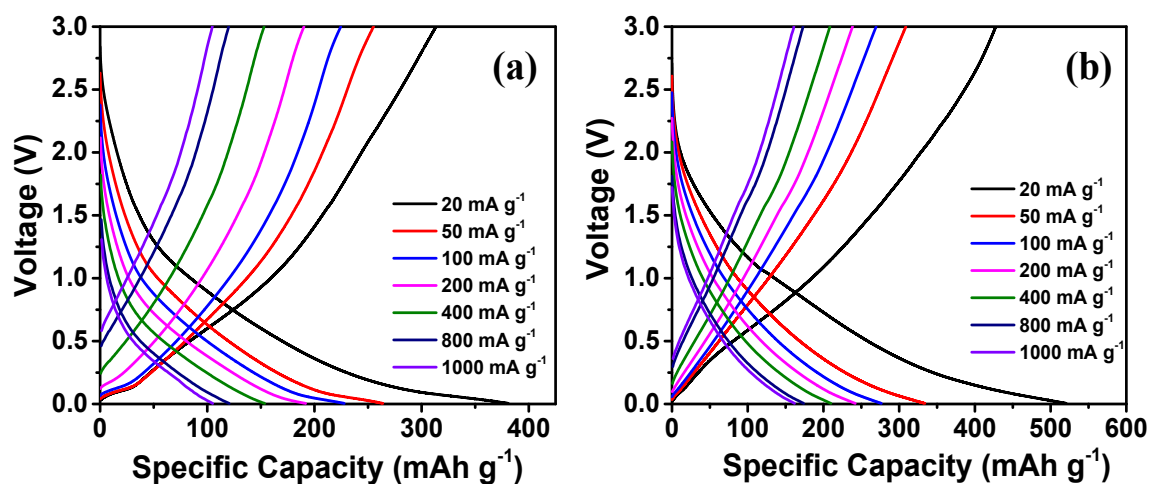

**Figure S3.** Charge-discharge curves at different rates for (a) HCS and (b) *N*-HCS tested against sodium.

**Table S1.** Physical and chemical properties of HCS and *N*-HCS

| Sample        | BET surface area (m <sup>2</sup> /g) | Pore volume (cm <sup>3</sup> /g) | Elemental composition (at. %)  | d-spacing | I <sub>D</sub> /I <sub>G</sub> ratio |
|---------------|--------------------------------------|----------------------------------|--------------------------------|-----------|--------------------------------------|
| HCS           | 82                                   | 0.04                             | C (69.81), O (30.19)           | 0.37 nm   | 0.75                                 |
| <i>N</i> -HCS | 16                                   | 0.03                             | C (72.77), N (9.06), O (18.17) | 0.39 nm   | 0.86                                 |

**Table S2.** Kinetic parameters obtained from equivalent circuit fittings of the experimental data for samples HCS and *N*-HCS before and after 5 cycles.

| Sample                         | $R_{el}$ ( $\Omega$ ) | $R_{ct}$ ( $\Omega$ ) |
|--------------------------------|-----------------------|-----------------------|
| HCS (before cycling)           | 14.46                 | 100.5                 |
| HCS (after 5 cycles)           | 10.04                 | 131.3                 |
| <i>N</i> -HCS (before cycling) | 12.30                 | 20.78                 |
| <i>N</i> -HCS (after 5 cycles) | 13.40                 | 27.96                 |

**Table S3.** A comparison of the N-rich carbon with those reported in the literature for sodium-ion batteries

| Material                              | Synthesis method                                          | Potential Range (V) | Electrolyte*                         | Capacity (mA h g <sup>-1</sup> ) | Cycling stability                                                                           | Rate capability                                                                                        | Remarks                                                                        | Theoretical studies performed | Ref.      |
|---------------------------------------|-----------------------------------------------------------|---------------------|--------------------------------------|----------------------------------|---------------------------------------------------------------------------------------------|--------------------------------------------------------------------------------------------------------|--------------------------------------------------------------------------------|-------------------------------|-----------|
| N-HCS                                 | Hydrothermal synthesis followed by pyrolysis              | 0.005 – 3           | NaClO <sub>4</sub> in EC, PC and FEC | 520 at 20 mA g <sup>-1</sup>     | ~204 mAhg <sup>-1</sup> obtained after 1000 cycles at 1 A g <sup>-1</sup>                   | 333 mA h g <sup>-1</sup> at 0.05 A g <sup>-1</sup><br>277 mA h g <sup>-1</sup> at 1 A g <sup>-1</sup>  | Highly stable cycling performance.                                             | Yes                           | This work |
| Nitrogen rich porous carbon           | Pyrolysis in Ar atmosphere                                | 0.01 - 3            | NaPF <sub>6</sub> in EC and DC       | 335 at 100 mA g <sup>-1</sup>    | ~130 mA h g <sup>-1</sup> at 5 A g <sup>-1</sup> after 1000 cycles was obtained.            | 256 mA h g <sup>-1</sup> at 0.2 A g <sup>-1</sup><br>213 mA h g <sup>-1</sup> at 1 A g <sup>-1</sup>   | A sloping profile was observable during charge-discharge                       | No                            | 1         |
| Nitrogen-rich bamboo-like carbon      | Pyrolysis in Ar atmosphere                                | 0.01 - 3            | NaClO <sub>4</sub> in EC and DC      | 270 at 50 mA g <sup>-1</sup>     | Lower than 120 mA h g <sup>-1</sup> at 0.5 A g <sup>-1</sup> after 160 cycles was obtained. | 167 mA h g <sup>-1</sup> at 0.1 A g <sup>-1</sup><br>138 mA h g <sup>-1</sup> at 0.2 A g <sup>-1</sup> | Hollow structure and nitrogen content was credited to the performance          | No                            | 2         |
| Nitrogen-doped carbon/graphene hybrid | Pyrolysis in N <sub>2</sub> atmosphere between 700-800 °C | 0.01 - 3            | NaClO <sub>4</sub> in EC and DC      | 303 at 50 mA g <sup>-1</sup>     | ~270 mA h g <sup>-1</sup> at 50 mA g <sup>-1</sup> after 200 cycles was obtained.           | 207 mA h g <sup>-1</sup> at 1 A g <sup>-1</sup><br>177 mA h g <sup>-1</sup> at 2 A g <sup>-1</sup>     | Large interlayer spacing and high content of nitrogen provide good performance | No                            | 3         |
| Nitrogen-rich                         | Pyrolysis in N <sub>2</sub>                               | 0.01 - 3            | NaClO <sub>4</sub> in                | 338 at 30                        | ~252 mA h g <sup>-1</sup>                                                                   | 86 mA h g <sup>-1</sup>                                                                                | Amorphous                                                                      | No                            | 4         |

|                                         |                                                                   |            |                                      |                               |                                                                                  |                                                                                                        |                                                                                           |    |              |
|-----------------------------------------|-------------------------------------------------------------------|------------|--------------------------------------|-------------------------------|----------------------------------------------------------------------------------|--------------------------------------------------------------------------------------------------------|-------------------------------------------------------------------------------------------|----|--------------|
| mesoporous carbon                       | atmosphere at 700 °C                                              |            | EC and DC                            | mA g <sup>-1</sup>            | <sup>1</sup> at 50 mA g <sup>-1</sup> after 100 cycles was obtained.             | at 1 A g <sup>-1</sup><br>48.9 mA h g <sup>-1</sup> at 2 A g <sup>-1</sup>                             | crystallites with a porous structure and large interlayer spacing provide good stability. |    |              |
| N-doped porous carbon                   | KOH activation followed by Pyrolysis in N <sub>2</sub> atmosphere | 0.01 – 2.5 | NaTFSI in EC and DC                  | 274 at 25 mA g <sup>-1</sup>  | Good cycling stability for 100 cycles was observed with 88% capacity retention   | 58 mA h g <sup>-1</sup> at 2 A g <sup>-1</sup><br>37 mA h g <sup>-1</sup> at 4 A g <sup>-1</sup>       | Carbons derived from garlic peel waste.                                                   | No | <sup>5</sup> |
| Nitrogen doped holey carbon nano-sheets | KOH activation followed by Pyrolysis in N <sub>2</sub> atmosphere | 0.01 - 3   | NaPF <sub>6</sub> in EC and DMC      | 323 at 100 mA g <sup>-1</sup> | ~80 mA h g <sup>-1</sup> at 1 A g <sup>-1</sup> after 400 cycles was obtained.   | 194 mA h g <sup>-1</sup> at 0.2 A g <sup>-1</sup><br>139 mA h g <sup>-1</sup> at 0.5 A g <sup>-1</sup> | Unique porous structure and nitrogen doping endow superior electrochemical performance    | No | <sup>6</sup> |
| Nitrogen-doped carbon nanofiber films   | Heating in vacuum followed by carbonising in Ar atmosphere        | 0.01 - 3   | NaClO <sub>4</sub> in EC, DC and FEC | 377 at 100 mA g <sup>-1</sup> | ~210 mA h g <sup>-1</sup> at 5 A g <sup>-1</sup> after 7000 cycles was obtained. | 315 mA h g <sup>-1</sup> at 0.5 A g <sup>-1</sup><br>154 mA h g <sup>-1</sup> at 15 A g <sup>-1</sup>  | A free standing electrode                                                                 | No | <sup>7</sup> |
| Nitrogen-doped carbon                   | Pyrolysis in N <sub>2</sub> atmosphere at                         | 0.01 - 2   | NaPF <sub>6</sub> in EC, DC and      | 150 at 200 mA                 | ~134 mA h g <sup>-1</sup> at 0.2 A g <sup>-1</sup>                               | 139 mA h g <sup>-1</sup> at 0.5 A g <sup>-1</sup>                                                      | Material prepared from polypyrrole                                                        | No | <sup>8</sup> |

| nanofibers                         | 600 °C                                               |           | PC                                    | g <sup>-1</sup>              | after 200 cycles was obtained.                                                     | 132 mA h g <sup>-1</sup> at 1 A g <sup>-1</sup>                                                    | nanofiber                                            |    |    |
|------------------------------------|------------------------------------------------------|-----------|---------------------------------------|------------------------------|------------------------------------------------------------------------------------|----------------------------------------------------------------------------------------------------|------------------------------------------------------|----|----|
| Nitrogen-doped carbon microspheres | Hydrothermal synthesis followed by thermal treatment | 0.005 – 3 | NaClO <sub>4</sub> in EC and PC       | 336 at 50 mA g <sup>-1</sup> | ~104 mA h g <sup>-1</sup> at 10 A g <sup>-1</sup> after 12500 cycles was obtained. | 148 mA h g <sup>-1</sup> at 5 A g <sup>-1</sup><br>132 mA h g <sup>-1</sup> at 1 A g <sup>-1</sup> | Highly stable cycling performance                    | No | 9  |
| Nitrogen-doped carbon sheets       | Hydrothermal treatment followed by pyrolysis         | 0.01 – 2  | NaClO <sub>4</sub> in EC, DMC and FEC | 315 at 0.15 C                | ~247 mA h g <sup>-1</sup> at 0.3 C after 50 cycles was obtained.                   | ca.100 mA h g <sup>-1</sup> at 3 C<br>32.3 mA h g <sup>-1</sup> at 30 C                            | High capacity and long cycle life batteries obtained | No | 10 |

\*PC = propylene carbonate, FEC = fluoroethylene carbonate, DMC = dimethyl carbonate, EC = ethylene carbonate, DC = diethyl carbonate.

## References

1. L. Wang, C. Yang, S. Dou, S. Wang, J. Zhang, X. Gao, J. Ma and Y. Yu, *Electrochim. Acta*, 2016, **219**, 592-603.
2. D. Li, L. Zhang, H. Chen, L. X. Ding, S. Wang and H. Wang, *Chem Commun (Camb)*, 2015, **51**, 16045-16048.
3. H. Liu, M. Jia, B. Cao, R. Chen, X. Lv, R. Tang, F. Wu and B. Xu, *J. Power Sources*, 2016, **319**, 195-201.
4. H. Liu, M. Jia, N. Sun, B. Cao, R. Chen, Q. Zhu, F. Wu, N. Qiao and B. Xu, *ACS Appl. Mater. Inter.*, 2015, **7**, 27124-27130.
5. V. Selvamani, R. Ravikumar, V. Suryanarayanan, D. Velayutham and S. Gopukumar, *Electrochim. Acta*, 2016, **190**, 337-345.
6. H. g. Wang, Z. Wu, F. l. Meng, D. l. Ma, X. l. Huang, L. m. Wang and X. b. Zhang, *ChemSusChem*, 2013, **6**, 56-60.
7. S. Q. Wang, L. Xia, L. Yu, L. Zhang, H. H. Wang and X. W. Lou, *Adv. Energy Mater.*, 2016, **6**, 1502217.
8. Z. Wang, L. Qie, L. Yuan, W. Zhang, X. Hu and Y. Huang, *Carbon*, 2013, **55**, 328-334.
9. D. Yan, C. Y. Yu, X. J. Zhang, W. Qin, T. Lu, B. W. Hu, H. L. Li and L. K. Pan, *Electrochim. Acta*, 2016, **191**, 385-391.
10. T. Yang, T. Qian, M. Wang, X. Shen, N. Xu, Z. Sun and C. Yan, *Adv. Mater.*, 2016, **28**, 539-545.
